# Supplementary material for: Controlled synthesis and photoelectric application of ZnIn2S4 nanosheet/TiO2 nanoparticle composite films
Source: Royal Society of Chemistry journal article supplement (doi:10.1039/c1jm12432c), 2011-01-01
Supplement: c1jm12432c.pdf [file c1jm12432c.pdf]

# Controlled Synthesis and Photoelectric Application of ZnIn<sub>2</sub>S<sub>4</sub> Nanosheet/TiO<sub>2</sub> Nanoparticle Composite Films

Shengjie Peng,<sup>\*a</sup> Yongzhi Wu,<sup>bc</sup> Peining Zhu,<sup>c</sup> Velmurugan Thavasi,<sup>d</sup> Seeram Ramakrishna,<sup>\*cde</sup> Subodh G. Mhaisalkar,<sup>a</sup>

5

<sup>a</sup>School of Materials Science and Engineering, Nanyang Technological University, Nanyang Avenue, Singapore 639798,

<sup>b</sup>NUS Graduate School for Integrative Sciences and Engineering, National University of Singapore, Singapore 117456, Singapore,

<sup>c</sup>Mechanical Engineering, National University of Singapore, Singapore 117576,

<sup>d</sup>NUS Nanoscience and Nanotechnology Initiative, National University of Singapore, Singapore 117576,

<sup>10</sup><sup>e</sup>King Saud University, 11451 Riyadh, Kingdom of Saudi Arabia.

\* Address correspondence to: [sjpeng@ntu.edu.sg](mailto:sjpeng@ntu.edu.sg), [seeram@nus.edu.sg](mailto:seeram@nus.edu.sg)

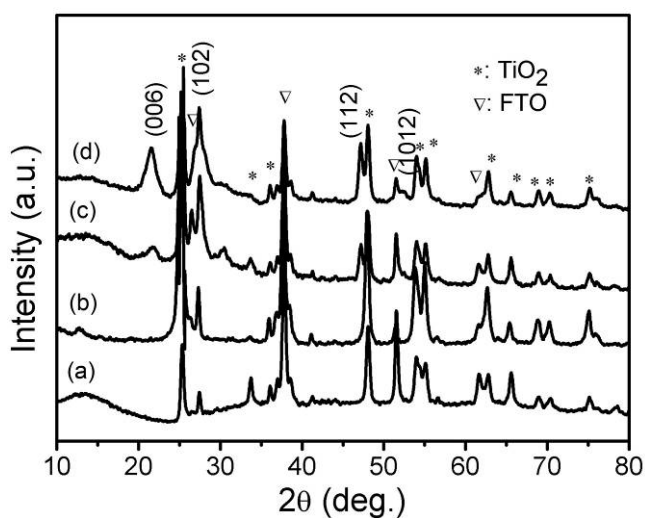

<sup>15</sup> **Fig. S1** XRD patterns of the ZnIn<sub>2</sub>S<sub>4</sub>/TiO<sub>2</sub> films obtained by using 0.25 mM of reactant concentration at different temperatures: 90 °C (a), 120 °C (b), 180 °C (c), and 210 °C (d) for 12 h, respectively.

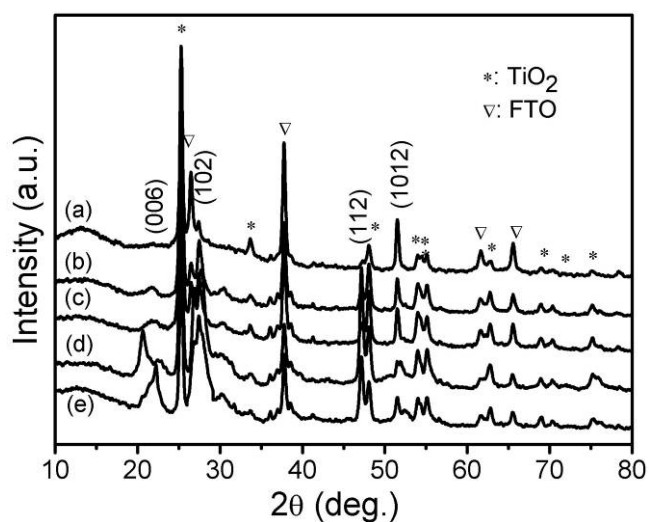

**Fig. S2** XRD patterns of the  $\text{ZnIn}_2\text{S}_4/\text{TiO}_2$  films obtained by using 0.25 mM of reactant concentration at 150 °C for different times: 1 h (a), 6 h (b), 18 h (c), 24 h (d), and 48 h (e), respectively.

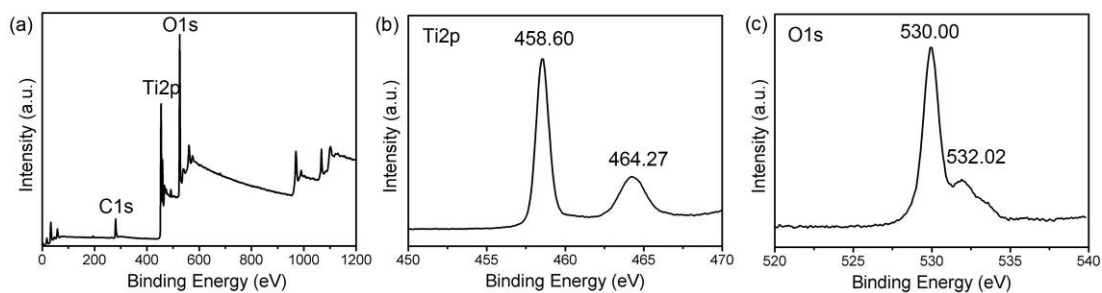

**Fig. S3** XPS survey (a), Ti2p (b), and O1s (c) of the screen-printing  $\text{TiO}_2$  film.

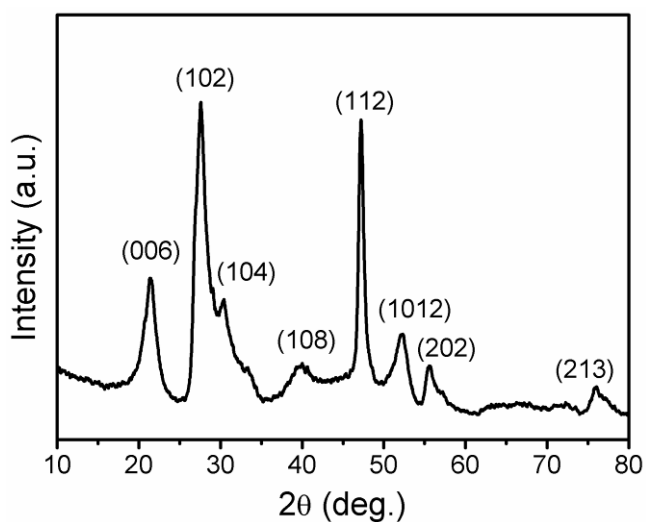

**Fig. S4** XRD pattern of  $\text{ZnIn}_2\text{S}_4$  precipitant product powder at the bottom of the autoclave.

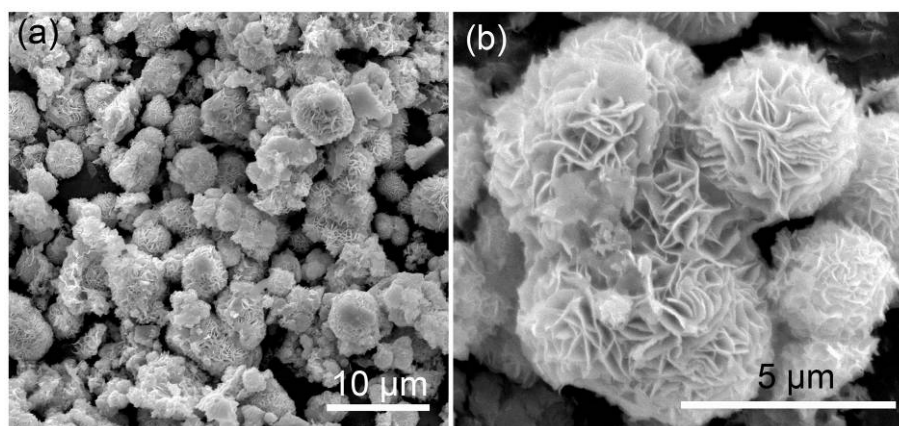

Fig. S5 SEM images of ZnIn<sub>2</sub>S<sub>4</sub> precipitant product powder at the bottom of the autoclave.

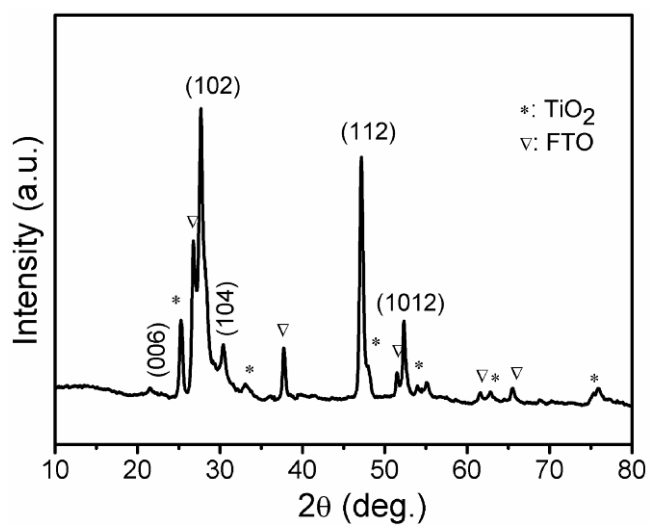

Fig. S6 XRD pattern of the ZnIn<sub>2</sub>S<sub>4</sub>/TiO<sub>2</sub> film (sample I) after heat treatment at 400 °C for 30 min under vacuum.

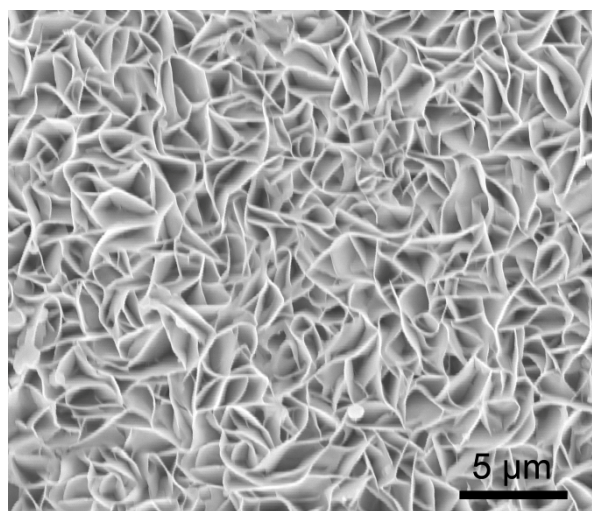

Fig. S7 SEM image of the ZnIn<sub>2</sub>S<sub>4</sub>/TiO<sub>2</sub> film (sample I) after heat-treatment at 400 °C for 30 min under vacuum.

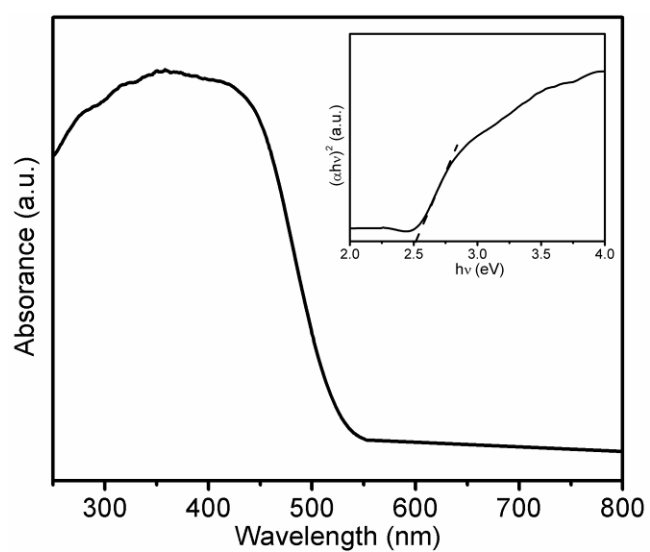

Fig. S8 UV spectrum of the ZnIn<sub>2</sub>S<sub>4</sub>/TiO<sub>2</sub> film (sample I) after heat-treatment at 400 °C for 30 min under vacuum.

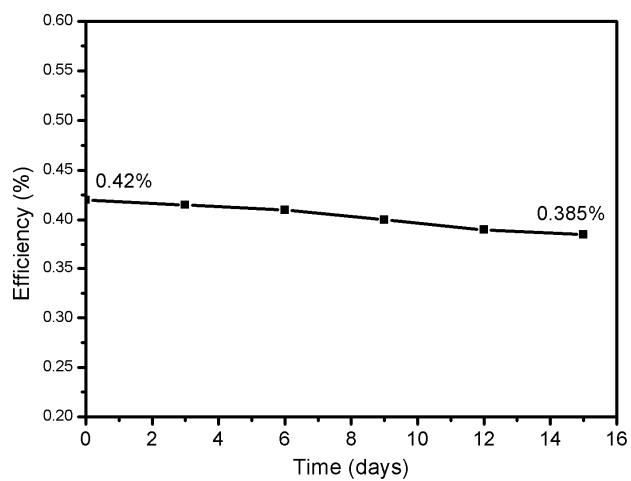

5

Fig. S9 A short-term evaluation of the stability of the sealed Cell IV, which was tested in ambient atmosphere.
